# Supplementary material
Source: PubMed Central journal article supplement (PMC8767495)
Supplement: NIHMS1760101-supplement-3.pdf [file NIHMS1760101-supplement-3.pdf]

TABLE S1

| Primary Antibody                           | Dilution                    | Incubation                   | Application                   | Host              | Company                  | Clone/Catalog No. |
|--------------------------------------------|-----------------------------|------------------------------|-------------------------------|-------------------|--------------------------|-------------------|
| GFAP                                       | 1:400                       | Over night, 4°C              | IF                            | Chicken           | Novus                    | NPP1-05198        |
| GFAP                                       | 1:100                       | Over night, 4°C              | WB                            | Rabbit            | Sigma-Aldrich Millipore  | AB5804            |
| Calbindin                                  | 1:400                       | Over night, 4°C              | IF                            | Mouse             | Sigma-Aldrich Millipore  | CB-955            |
| Calbindin                                  | 1:400                       | Over night, 4°C              | IF                            | Rabbit            | Cell Signaling Tech.     | 13176S            |
| CD68                                       | 1:800                       | Over night, 4°C              | IF                            | Rat               | Sigma-Aldrich Millipore  | FA-11             |
| SLC1A3                                     | 1:1000                      | Over night, 4°C              | WB                            | Rabbit            | ThermoFischer Scientific | PA5-19709         |
| ACSA-2-APC                                 | 1:100                       | 30 minutes, 4°C              | FC                            | Rat               | Miltenyi Biotec          | IH3-18A3          |
| GLAST-PE                                   | 1:200                       | Over night, 4°C              | FC                            | Mouse             | Miltenyi Biotec          | ACSA-1            |
| Beta-Tubulin                               | 1:5000                      | Over night, 4°C              | WB                            | Mouse             | Sigma-Aldrich Millipore  |                   |
| Secondary Antibody                         | Dilution                    | Incubation                   | Application                   | Host              | Company                  | Clone/Catalog No. |
| anti-Chicken conjugated to Alexa-Fluor 488 | 1:2000                      | 1 hour, room temperature     | IF                            | Goat              | ThermoFischer Scientific | A-11039           |
| anti-Mouse conjugated to Alexa-Fluor 488   | 1:2000                      | 1 hour, room temperature     | IF                            | Goat              | ThermoFischer Scientific | A28175            |
| anti-Mouse conjugated to DyLight-594       | 1:2000                      | 1 hour, room temperature     | IF                            | Goat              | ThermoFischer Scientific | 35510             |
| anti-Mouse conjugated to Alexa-Fluor-633   | 1:2000                      | 1 hour, room temperature     | IF                            | Goat              | ThermoFischer Scientific | A-21052           |
| anti-Rabbit conjugated to Alexa-Fluor 488  | 1:2000                      | 1 hour, room temperature     | IF                            | Goat              | ThermoFischer Scientific | A27034            |
| anti-Rabbit conjugated to AlexaFluor-594   | 1:2000                      | 1 hour, room temperature     | IF                            | Goat              | ThermoFischer Scientific | R37119            |
| anti-Rabbit conjugated to Alexa-Fluor-633  | 1:2000                      | 1 hour, room temperature     | IF                            | Goat              | ThermoFischer Scientific | A-21071           |
| anti-Rabbit Horseradish Peroxidase         | 1:20000                     | 1 hour, room temperature     | WB                            | Goat              | ThermoFischer Scientific | 65-6120           |
| anti-mouse Horseradish Peroxidase          | 1:20000                     | 1 hour, room temperature     | WB                            | Goat              | ThermoFischer Scientific | 62-6520           |
| Reagent                                    | Dilution                    | Incubation                   | Application                   | Host              | Company                  | Clone/Catalog No. |
| Hoechst 3342                               | 1:5000                      | 15 minutes, room temperature | IF                            | N/A               | ThermoFischer Scientific | 62249             |
| Blue Live/Dead                             | 1:200                       | 10 minutes, 4°C              | FACS                          | N/A               | ThermoFischer Scientific | L23105            |
| Goat Serum                                 | 1:20                        | 1 hour, 4°C                  | IF                            | N/A               | Sigma-Aldrich Millipore  | G9023             |
| 30% Bovine Serum Albumin                   | 1:10                        | 10 minutes, 4°C              | FACS                          | Bovine            | Sigma-Aldrich Millipore  | A9576-50ML        |
| TruStain FcX                               | 1:100                       | 10 minutes, 4°C              | FACS                          | Rat               | Biologend                | 101320            |
| Bovine Serum Albumin                       | 2% w/v                      |                              | WB                            |                   | Sigma-Aldrich Millipore  | A7030             |
| Paraformaldehyde                           | 4% w/v                      |                              | IF                            |                   | Sigma-Aldrich Millipore  | A6148             |
| NuPAGE                                     |                             |                              | WB                            |                   | Sigma-Aldrich Millipore  | NP0002            |
| T-PER                                      |                             |                              | WB                            |                   | ThermoFischer Scientific | #78510            |
| cOmplete™ Protease Inhibitor Cocktail      |                             |                              | WB                            |                   | Sigma-Aldrich Millipore  | 11697498001       |
| Ceftriaxone                                |                             |                              | cell culture, mouse treatment |                   | Cayman                   | 18866             |
| Riluzole                                   |                             |                              | cell culture, mouse treatment |                   | Selleckchem              | S1614             |
| Miglustat                                  |                             |                              | cell culture                  |                   | Sigma-Aldrich Millipore  | 72599-27-0        |
| Hydroxy-Propyl-β-Cyclodextrin              |                             |                              | cell culture                  |                   | Roquette                 |                   |
| DMEM                                       |                             |                              | cell culture                  |                   | ThermoFischer Scientific | 41965-062         |
| Penicillin-Streptomycin                    |                             |                              | cell culture                  |                   | ThermoFischer Scientific | 15140-122         |
| Fetal Bovine Serum                         |                             |                              | cell culture                  |                   | Gemini                   | 100-500           |
| 0.05% Trypsin-EDTA                         |                             |                              | cell culture                  |                   | ThermoFischer Scientific | 25-300-054        |
| Clarity Western ECL                        |                             |                              | WB                            |                   | BioRad                   | 705061            |
| DMSO                                       |                             |                              |                               |                   | Sigma-Aldrich Millipore  | D2650             |
| 2-Mercaptoethanol                          |                             |                              | WB                            |                   | Sigma-Aldrich Millipore  | M6250             |
| Glutamate Assay Kit                        |                             |                              | cell culture                  |                   | CellBiolabs              | MET-5080          |
| Poly-L-Lysine                              |                             |                              | cell culture                  |                   | ScienCell                | 0403              |
| KAPA Taq ReadyMix                          |                             |                              | Genotyping                    |                   | Sigma-Aldrich Millipore  | KK1006            |
| Taqman Probes                              | Dilution                    | Application                  | Company                       | Clone/Catalog No. |                          |                   |
| mmuActb                                    | 1:20                        | PCR                          | ThermoFischer Scientific      | Mm00607939        |                          |                   |
| mmuSlc1a3                                  | 1:20                        | PCR                          | ThermoFischer Scientific      | Mm00600697        |                          |                   |
| mmuSlc1a2                                  | 1:20                        | PCR                          | ThermoFischer Scientific      | Mm01275814        |                          |                   |
| mmuGfap                                    | 1:20                        | PCR                          | ThermoFischer Scientific      | Mm01253033        |                          |                   |
| Software                                   | Host                        | Company                      | Version                       |                   |                          |                   |
| Prism 5                                    | 64bits Windows 7            | Graphpad                     | Version 5.01                  |                   |                          |                   |
| R/Rstudio                                  | 64bits Windows 7            | CRAN foundation              | Version 1.1.463               |                   |                          |                   |
| MS Office 2016                             | 64bits Windows 7            | Microsoft                    |                               |                   |                          |                   |
| 7300 System Sequence Detection             | 32bits Windows XP           | Applied Biosystem            | Version 1.4.0.25              |                   |                          |                   |
| ZEN2(Blue)                                 | 64bits Windows 7            | Zeiss                        |                               |                   |                          |                   |
| Image Lab Software                         | 64bits Windows 7            | BioRad                       | Version 3.0.1                 |                   |                          |                   |
| ImageJ                                     | 64bits Windows 7            | NIH                          | Version 1.52i                 |                   |                          |                   |
| Primers                                    | Sequence                    | Application                  | Company                       |                   |                          |                   |
| Npc1_F                                     | GGACAGCCAAGTAGGCGAC         | PCR Npc1 KO                  | Integrated DNA Technologies   |                   |                          |                   |
| Npc1_R                                     | GACGTGTGCACCCCCTTTC         | PCR Npc1 KO                  | Integrated DNA Technologies   |                   |                          |                   |
| Human Brain samples                        | Company                     |                              |                               |                   |                          |                   |
| UMB#754                                    | NICHD Blood and Tissue Bank |                              |                               |                   |                          |                   |
| UMB#1841                                   | NICHD Blood and Tissue Bank |                              |                               |                   |                          |                   |
| UMB#914                                    | NICHD Blood and Tissue Bank |                              |                               |                   |                          |                   |
| UMB#5282                                   | NICHD Blood and Tissue Bank |                              |                               |                   |                          |                   |
| UMB#4237                                   | NICHD Blood and Tissue Bank |                              |                               |                   |                          |                   |
| UMB#4770                                   | NICHD Blood and Tissue Bank |                              |                               |                   |                          |                   |
| UMB#5372                                   | NICHD Blood and Tissue Bank |                              |                               |                   |                          |                   |
| UMB#M4002M                                 | NICHD Blood and Tissue Bank |                              |                               |                   |                          |                   |
