# Supplementary material
Source: PubMed Central journal article supplement (PMC8767495)

**Figure S1**

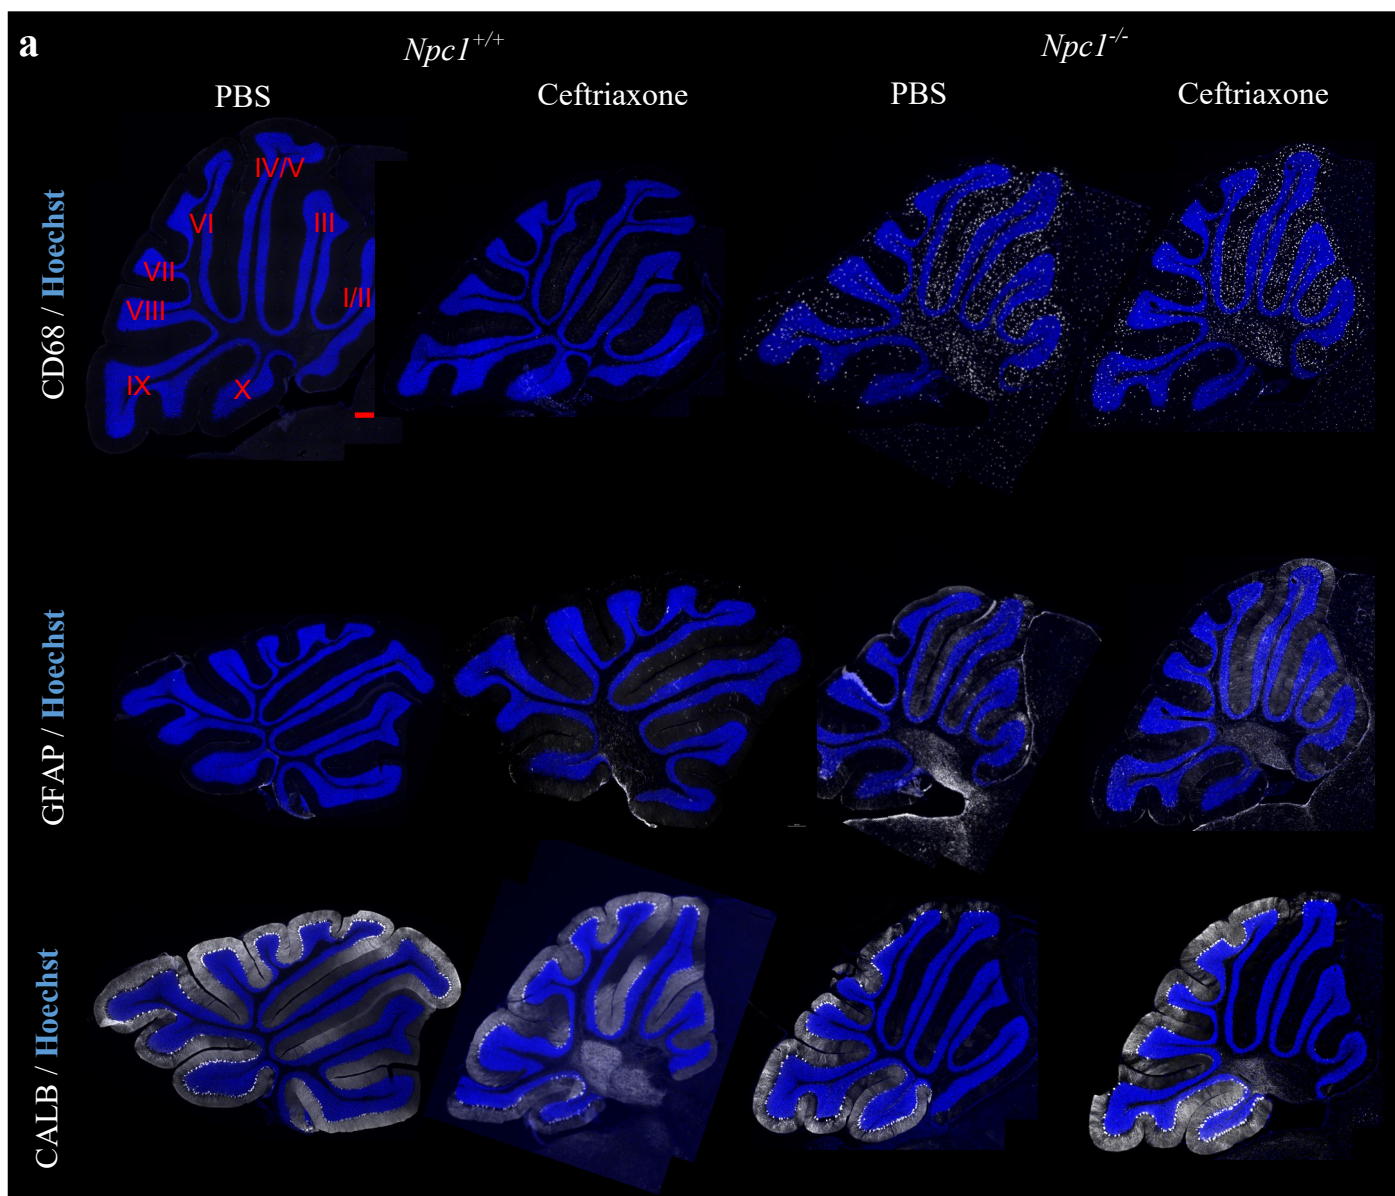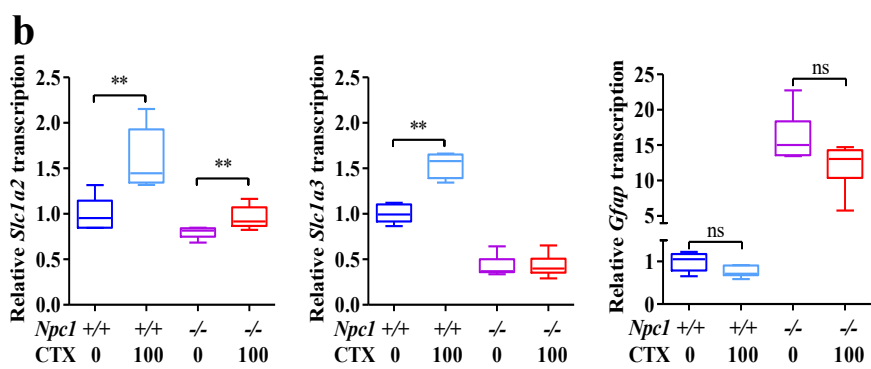

Supplement: NIHMS1760101-supplement-1.pdf [file NIHMS1760101-supplement-1.pdf]

**Figure S2**

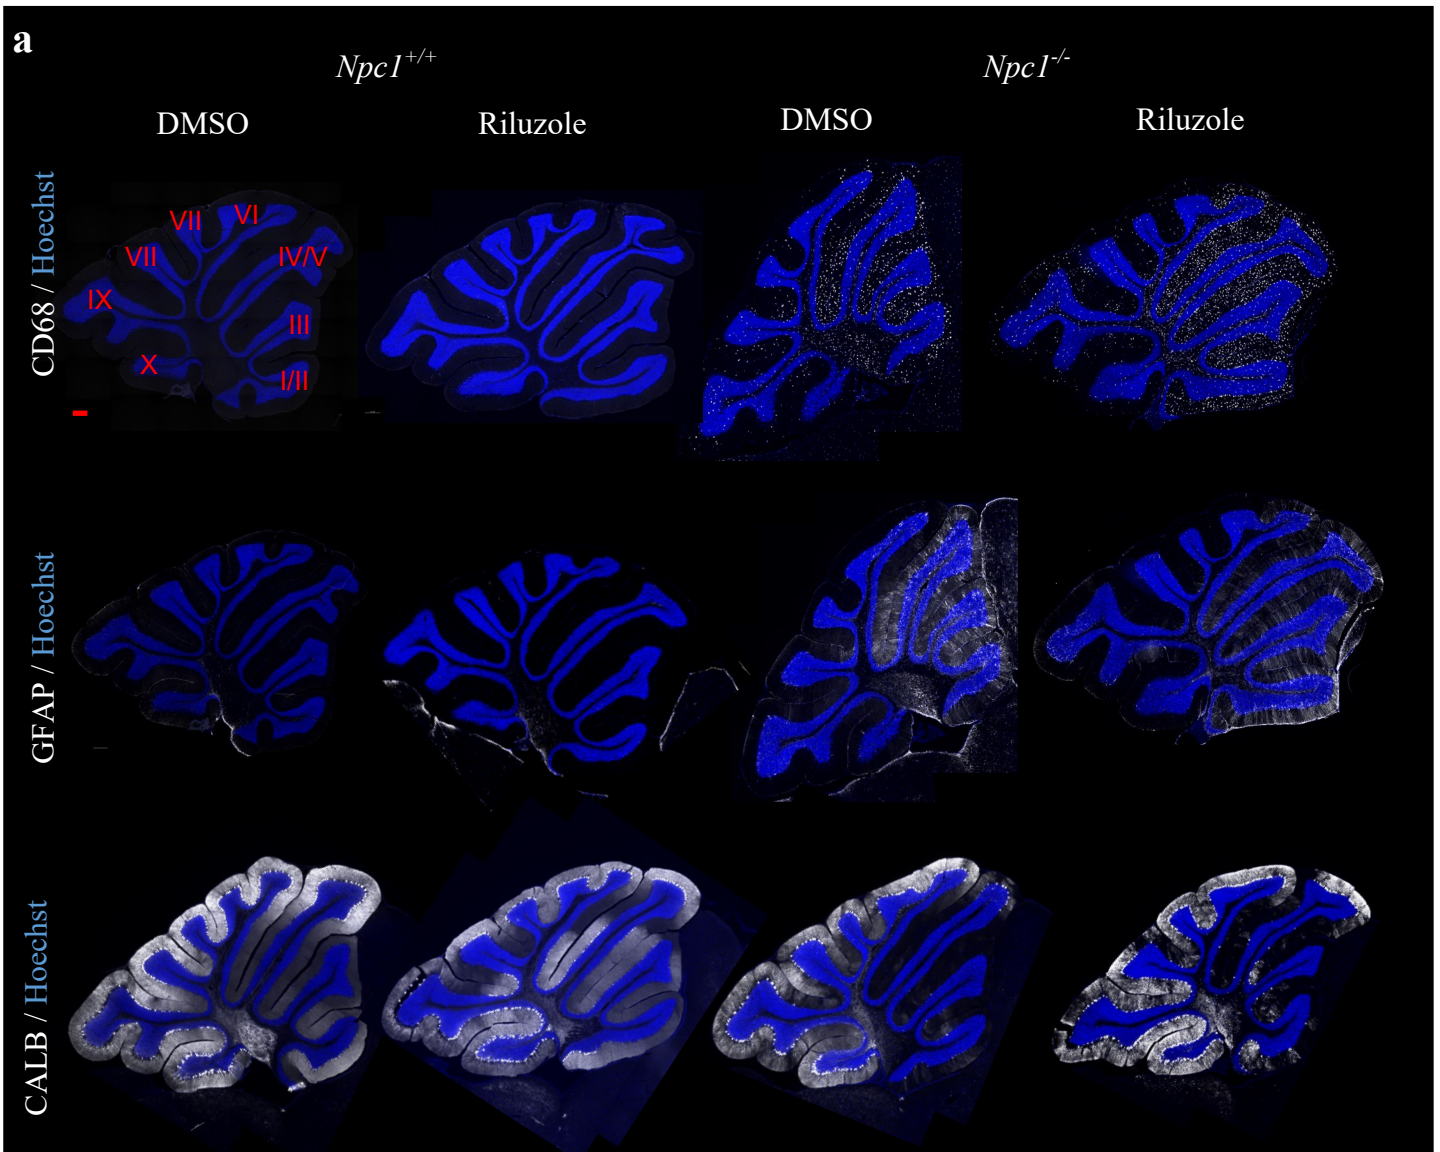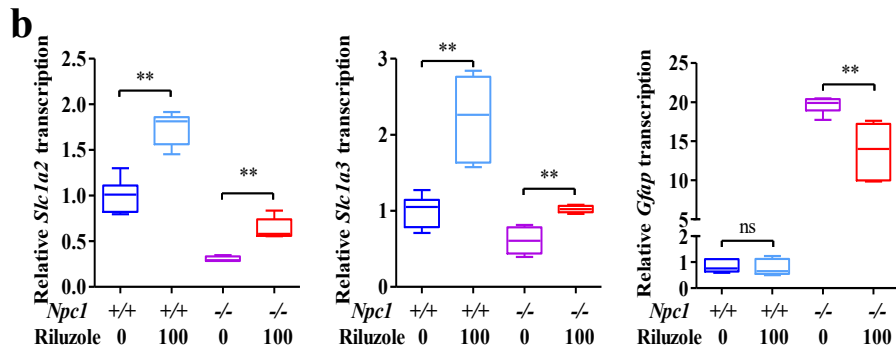

Supplement: NIHMS1760101-supplement-2.pdf [file NIHMS1760101-supplement-2.pdf]
